# Supplementary material for: Advanced diesel from ethanol: a pathway to produce sustainable and high-quality drop-in biofuels
Source: Royal Society of Chemistry journal article supplement (doi:10.1039/d4se00943f), 2024-10-07
Supplement: d4se00943f1.pdf [file d4se00943f1.pdf]

## Supplementary Information for

**Advanced diesel from ethanol, a pathway to produce sustainable and high-quality drop-in biofuels**

**Juan-Manuel Restrepo-Flórez<sup>1,2\*</sup>, Javier E. Chavarrio<sup>1\*</sup>, Emmanuel Canales<sup>1\*</sup>, Paolo Cuello-Peñaloza<sup>1</sup>,  
Dustin Witkowski<sup>2</sup>, Srinath Subramanian<sup>2</sup>, David A. Rothamer<sup>2</sup>, Christos T. Maravelias<sup>3,4</sup>, and George  
W. Huber<sup>1</sup>**

*<sup>1</sup>Department of Chemical and Biological Engineering, University of Wisconsin–Madison*

*<sup>2</sup>Department of Mechanical Engineering, University of Wisconsin–Madison*

*<sup>3</sup>Department of Chemical and Biological Engineering, Princeton University*

*<sup>4</sup>Andlinger Center for Energy and the Environment, Princeton University*

*\*These authors contributed equally to this paper*

### Index

**S1. Supplemental information for cofeeding experiments**

**S2. Supplemental information for hydrogenolysis experiments**

**S3. Supplemental information for etherification experiments**

**S4. Supplemental information for the techno-economic analysis**

**S5. Supplemental information for lifecycle analysis**

**S6. Engine performance**



## S1. Supplemental information for cofeeding experiments

**Table S1.** Detailed mole flow in inlet and outlet of Guerbet coupling reactor for cofeed (Ethanol (70% mol) / Butanol (30%)) and control experiments (pure ethanol feed). WHSV values reported are in units of  $\text{g}_{\text{ethanol}} \text{h}^{-1} \text{g}_{\text{cat}}^{-1}$ .

|                          | Cofeed 1                         |         | Control 1 |         | Cofeed 2 |        | Control 2 |        | Cofeed 3 |        | Control 3 |        |
|--------------------------|----------------------------------|---------|-----------|---------|----------|--------|-----------|--------|----------|--------|-----------|--------|
| WHSV ( $\text{h}^{-1}$ ) | 26.27                            |         | 26.27     |         | 6.53     |        | 6.53      |        | 1.33     |        | 1.33      |        |
| Mass catalyst (g)        | 0.1005                           |         | 0.1003    |         | 0.1002   |        | 0.1       |        | 0.7429   |        | 0.4047    |        |
|                          | C flow ( $\mu\text{mol C/min}$ ) |         |           |         |          |        |           |        |          |        |           |        |
| Compound                 | inlet                            | outlet  | inlet     | outlet  | inlet    | outlet | inlet     | outlet | inlet    | outlet | inlet     | outlet |
| Methane                  |                                  |         |           | 5.82    |          | 2.67   |           | 0.14   |          | 0.76   |           | 0.60   |
| ethylene                 |                                  |         |           | 0.16    |          | 0.07   |           | 0.04   |          | 0.44   |           | 0.26   |
| ethane                   |                                  |         |           | 0.12    |          | 0.07   |           | 0.03   |          | 0.28   |           | 0.08   |
| propane                  |                                  | 3.83    |           | 0.19    |          | 0.19   |           | 0.06   |          | 0.43   |           |        |
| propene                  |                                  |         |           | 0.26    |          | 0.55   |           | 0.33   |          | 1.17   |           | 0.04   |
| methanol                 |                                  |         |           |         |          |        |           | 0.06   |          | 1.90   |           | 0.72   |
| 1-butene                 |                                  | 3.27    |           | 0.81    |          | 0.10   |           | 0.33   |          | 0.80   |           |        |
| n-butane                 |                                  |         |           |         |          | 0.24   |           | 0.01   |          | 0.10   |           |        |
| acetone                  |                                  |         |           |         |          |        |           | 0.00   |          | 9.74   |           | 0.77   |
| acetaldehyde             |                                  | 150.38  |           | 129.06  |          | 30.51  |           | 27.57  |          | 92.12  |           | 34.83  |
| n-pentane                |                                  | 1.04    |           |         |          | 0.77   |           |        |          |        |           |        |
| diethyl ether            |                                  | 0.18    |           | 0.81    |          | 0.03   |           | 0.22   |          |        |           | 1.49   |
| pentenes                 |                                  |         |           | 1.21    |          |        |           | 0.86   |          | 0.14   |           |        |
| n-hexane                 |                                  | 0.68    |           | 1.85    |          | 0.01   |           | 1.31   |          |        |           |        |
| ethanol                  | 1910.51                          | 1402.82 | 1918.15   | 1282.04 | 473.28   | 275.68 | 479.54    | 275.39 | 718.60   | 244.07 | 411.03    | 111.14 |
| 2-propanol               |                                  |         |           | 1.09    |          | 0.31   |           | 0.23   |          | 2.26   |           | 0.82   |
| butyraldehyde            |                                  | 228.03  |           | 59.29   |          | 56.71  |           | 17.23  |          | 127.99 |           | 33.42  |
| ethyl acetate            |                                  | 31.31   |           | 33.59   |          | 9.07   |           | 7.65   |          | 33.80  |           | 16.50  |
| 2-butanol                |                                  |         |           | 1.06    |          | 0.25   |           | 0.03   |          |        |           |        |
| 2-butanone               |                                  | 2.02    |           | 3.71    |          | 0.87   |           | 0.49   |          | 11.40  |           | 1.24   |
| 1-butanol                | 1626.66                          | 1427.11 |           | 268.31  | 401.28   | 329.95 |           | 72.88  | 612.70   | 368.37 |           | 73.33  |
| cis-crotyl alcohol       |                                  | 0.73    |           | 1.26    |          |        |           | 0.48   |          |        |           |        |
| 1,1-diethoxyethane       |                                  | 1.11    |           | 11.52   |          | 0.71   |           | 5.64   |          |        |           | 2.94   |
| 2-pentanone              |                                  | 9.86    |           | 4.48    |          | 3.50   |           | 1.34   |          | 34.88  |           | 7.15   |
| 2-pentanol               |                                  |         |           | 0.72    |          |        |           | 0.09   |          | 3.91   |           | 0.59   |
| 2-methyl-1-butanol       |                                  | 1.07    |           |         |          | 0.19   |           |        |          | 1.23   |           |        |
| 2-ethylbutanal           |                                  | 7.66    |           | 3.78    |          | 0.20   |           | 0.45   |          | 11.48  |           | 3.65   |
| ethyl butanoate          |                                  | 25.76   |           | 11.57   |          | 9.27   |           | 4.08   |          | 41.35  |           | 14.59  |
| butyl acetate            |                                  | 22.98   |           | 4.90    |          | 7.52   |           | 1.41   |          | 34.09  |           | 13.18  |
| hexanal                  |                                  | 18.88   |           | 8.72    |          | 7.32   |           | 3.59   |          | 20.95  |           | 4.85   |
| 2-ethylbutan-1-ol        |                                  | 23.49   |           | 10.15   |          | 10.02  |           | 3.88   |          | 22.32  |           | 5.47   |
| 1,1-diethoxybutane       |                                  | 1.25    |           | 2.74    |          | 0.62   |           | 1.67   |          |        |           | 0.72   |
| 1-butoxy-1-ethoxyethane  |                                  |         |           | 4.50    |          | 1.49   |           | 2.52   |          |        |           |        |
| 1-hexanol                |                                  | 98.20   |           | 37.82   |          | 35.88  |           | 15.39  |          | 51.09  |           | 11.04  |

|                              |  |       |  |      |  |       |  |       |  |       |  |       |
|------------------------------|--|-------|--|------|--|-------|--|-------|--|-------|--|-------|
| 4-heptanone                  |  | 0.51  |  | 2.39 |  | 3.43  |  | 0.71  |  | 19.86 |  | 5.52  |
| 2-heptanol                   |  |       |  |      |  | 0.29  |  |       |  | 0.94  |  |       |
| 2-heptanone                  |  | 1.87  |  | 0.85 |  | 1.15  |  | 0.32  |  | 9.92  |  | 2.30  |
| 2-ethylhexanal               |  | 2.98  |  | 1.10 |  | 1.62  |  | 0.67  |  | 5.79  |  | 1.35  |
| 2-ethylbutyl acetate         |  |       |  |      |  |       |  |       |  | 1.25  |  |       |
| butyl butanoate              |  | 18.35 |  | 1.49 |  | 7.24  |  | 0.72  |  | 35.40 |  | 4.12  |
| ethyl hexanoate              |  | 4.56  |  | 2.59 |  | 2.61  |  | 1.17  |  | 9.72  |  | 3.54  |
| 3-octanone                   |  |       |  |      |  | 0.18  |  |       |  | 1.00  |  |       |
| hexyl acetate                |  | 1.81  |  | 0.82 |  | 0.93  |  | 0.34  |  | 5.13  |  | 1.50  |
| octanal                      |  | 2.18  |  | 1.76 |  | 1.40  |  | 0.91  |  | 3.91  |  | 1.65  |
| 2-ethylhexan-1-ol            |  | 8.11  |  | 2.30 |  | 4.25  |  | 1.44  |  | 9.70  |  | 1.45  |
| 1,1-dibutoxyethane           |  | 1.61  |  | 1.15 |  | 1.06  |  | 0.62  |  | 1.06  |  | 0.68  |
| 1-octanol                    |  | 10.62 |  | 7.02 |  | 5.61  |  | 3.99  |  | 8.56  |  | 2.45  |
| 4-nonanone                   |  | 2.24  |  | 1.01 |  | 1.98  |  | 0.45  |  | 8.23  |  | 1.35  |
| 2-nonanone                   |  |       |  |      |  | 0.39  |  | 0.08  |  | 2.38  |  | 1.19  |
| 2-Ethylbutyl butyrate        |  |       |  |      |  | 0.12  |  |       |  | 1.29  |  |       |
| butyl hexanoate              |  | 5.56  |  | 0.51 |  | 3.69  |  | 0.40  |  | 17.01 |  | 4.97  |
| hexyl butanoate              |  |       |  | 0.70 |  |       |  | 0.38  |  |       |  |       |
| octyl acetate                |  | 0.40  |  |      |  |       |  | 0.13  |  | 1.09  |  |       |
| 2-ethyloctan-1-ol            |  |       |  |      |  | 0.47  |  | 0.25  |  | 0.82  |  |       |
| decanal                      |  |       |  | 0.60 |  | 0.49  |  | 0.42  |  |       |  |       |
| 2-hexyl-1-octanol            |  | 0.98  |  | 0.70 |  | 1.10  |  | 0.68  |  | 2.08  |  | 0.16  |
| 1-decanol                    |  | 1.47  |  | 1.11 |  | 0.68  |  | 1.26  |  | 1.41  |  | 0.18  |
| 4-undecanone                 |  |       |  |      |  | 1.23  |  | 0.21  |  | 2.83  |  | 0.36  |
| hexyl hexanoate              |  | 1.26  |  |      |  | 0.39  |  | 0.44  |  | 5.01  |  | 0.97  |
| butyl decanoate              |  |       |  |      |  | 0.32  |  |       |  |       |  |       |
| decyl acetate                |  |       |  |      |  |       |  | 0.02  |  |       |  |       |
| butyl decanoate              |  |       |  |      |  |       |  | 0.03  |  |       |  |       |
| 2-ethylhexyl ester butanoate |  |       |  |      |  |       |  |       |  | 0.83  |  |       |
| 2-undecanone                 |  |       |  |      |  |       |  |       |  | 0.82  |  |       |
| 2-butyl-1-octanol            |  |       |  |      |  |       |  | 0.03  |  |       |  |       |
| 2-ethyl-1-decanol            |  |       |  |      |  |       |  | 0.35  |  |       |  |       |
| 1-dodecanol                  |  |       |  |      |  |       |  | 0.40  |  | 1.11  |  |       |
| 2-tridecanone                |  |       |  |      |  |       |  |       |  |       |  | 1.13  |
| <b>Missing Carbon</b>        |  | 10.96 |  | 0.53 |  | 47.88 |  | 16.90 |  | 55.72 |  | 36.74 |

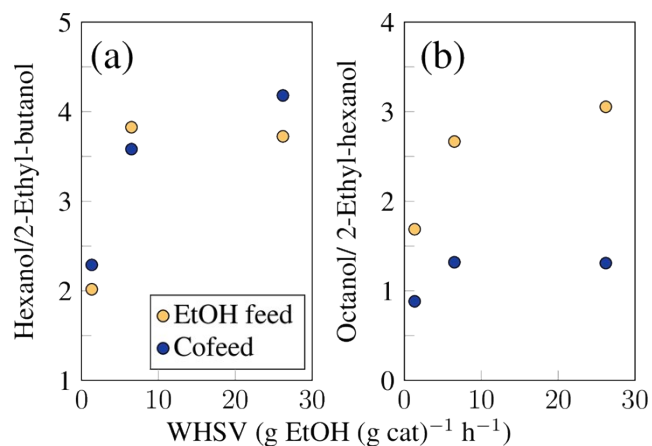

**Figure S1.** Mol ratio of (a) Hexanol to 2-Ethyl-butanol and (b) Octanol to 2-Ethyl-hexanol when cofeeding Ethanol (70% mol) / Butanol (30%) (blue circles) accompanied with control experiments with pure ethanol feed (yellow circles).  $T=325^{\circ}\text{C}$ ,  $P_{\text{tot}}=300$  psig, Ethanol+Butanol:H<sub>2</sub>= 4:1, 100-300 mg 0.1%Cu/Mg<sub>3</sub>AlO.

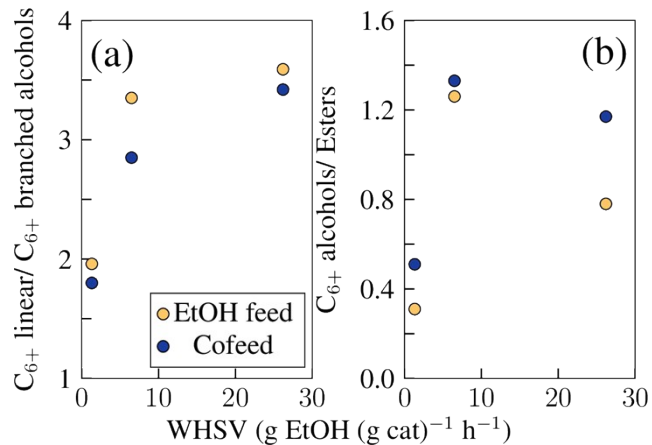

**Figure S2.** (a) C<sub>6</sub>+ Linear to branched alcohols ratio and (b) C<sub>6</sub>+ alcohols to ester ratio when cofeeding Ethanol (70% mol) / Butanol (30%) (blue circles) accompanied with control experiments with pure ethanol feed (yellow circles).  $T=325^{\circ}\text{C}$ ,  $P_{\text{tot}}=300$  psig, Ethanol+Butanol:H<sub>2</sub>= 4:1, 100-300 mg 0.1%Cu/Mg<sub>3</sub>AlO.

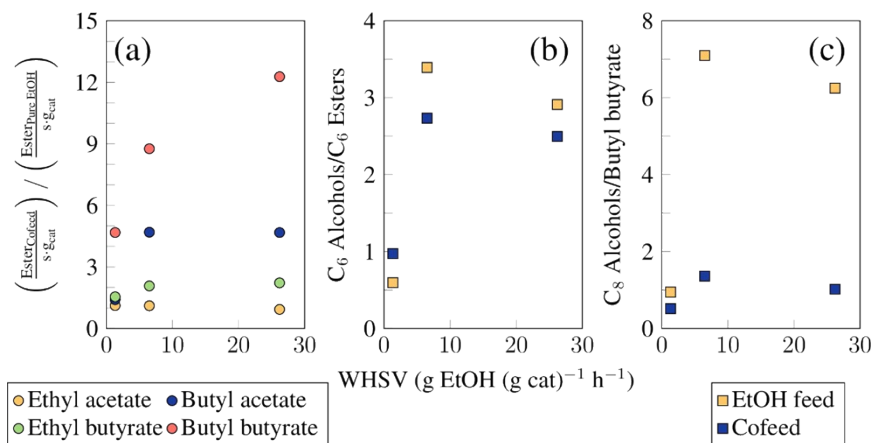

**Figure S3.** (a) Mol flow of esters in cofeed strategy / esters in control experiments, (b) mol ratio of C6 alcohols to C6 esters, and (c) mol ratio of C8 alcohols to butyl butyrate as a function of WHSV for cofeed strategy and control experiments.

## S2. Supplemental information for hydrogenolysis experiments

**Table S2.** Composition used to evaluate the hydrogenolysis catalyst. Real G-66 data from a previous work<sup>1</sup>. Renormalized G-66 refers to the mol fractions produced when molecules with alkyl chains with more than eight carbons are neglected. Experimental G-66 represents the mol fraction of the simulated Guerbet stream produced in-house. In all the columns the overall alcohol and ester mol fraction was targeted to remain constant.

| Compound                 | Real G-66 (%) | Renormalized G-66 (%) | Experimental G-66 (%) |
|--------------------------|---------------|-----------------------|-----------------------|
| 1-Butanol                | 62.88         | 64.54                 | 63.86                 |
| 2-pentanol               | 1.74          | 1.79                  | 2.08                  |
| 1-hexanol                | 13.28         | 13.63                 | 13.63                 |
| 2-ethyl-1-butanol        | 4.67          | 4.79                  | 4.99                  |
| 2-heptanol               | 1.16          | 1.19                  | 1.19                  |
| 1-octanol                | 3.27          | 3.36                  | 3.32                  |
| 2-ethyl-1-hexanol        | 3.04          | 3.12                  | 3.27                  |
| 4-nonanol                | 0.69          |                       |                       |
| 1-decanol                | 0.75          |                       |                       |
| 2-undecanol              | 0.36          |                       |                       |
| 1-dodecanol              | 0.36          |                       |                       |
| 1-tetradecanol           | 0.09          |                       |                       |
| 2-Pentadecanol           | 0.12          |                       |                       |
| 2-Heptadecanol           | 0.00          |                       |                       |
| Isopropyl acetate        | 0.00          |                       |                       |
| ethyl butanoate          | 0.00          |                       |                       |
| Butyl acetate            | 0.00          |                       |                       |
| Isopropyl butyrate       | 0.09          |                       |                       |
| Butyl butanoate          | 1.95          | 2.23                  | 2.20                  |
| Ethyl hexanoate          | 1.09          | 1.25                  | 1.22                  |
| Hexyl acetate            | 0.70          | 0.80                  | 0.86                  |
| Butyl hexanoate          | 1.62          | 1.85                  | 1.83                  |
| Hexyl butanoate          | 0.19          | 0.21                  | 0.22                  |
| Ethyl octanoate          | 0.00          | 0.00                  | 0.00                  |
| Octyl acetate            | 0.12          | 0.14                  | 0.16                  |
| Octyl butanoate          | 0.10          | 0.12                  | 0.15                  |
| Butyl octanoate          | 0.05          | 0.06                  | 0.07                  |
| Ethyl decanoate          | 0.73          |                       |                       |
| Decyl acetate            | 0.05          |                       |                       |
| Hexyl hexanoate          | 0.10          | 0.12                  | 0.12                  |
| Hexyl octanoate          | 0.58          | 0.66                  | 0.64                  |
| Ethyl dodecanoate        | 0.04          |                       |                       |
| Dodecyl acetate          | 0.04          |                       |                       |
| Octyl octanoate          | 0.12          | 0.13                  | 0.19                  |
| <b>Alcohol mol frac.</b> | <b>92.42</b>  | <b>92.42</b>          | <b>92.35</b>          |
| <b>Ester mol frac.</b>   | <b>7.58</b>   | <b>7.58</b>           | <b>7.65</b>           |

**Table S3.** Mole concentration in the outlet of hydrogenolysis reactor for the model mixture Hexyl acetate – Butanol 95-5% mol, accompanied by the percentage of ethyl, butyl, and hexyl chains identified at the outlet of the reactor with respect to those that were fed. Data reported at WHSV=0 was obtained from Aspen Plus, while data at WHSV= $\infty$  represents the mole concentration of all the species in the feed.

| WHSV (h <sup>-1</sup> )            | $\infty$ (Feed) | 0.81                                   | 0.40    | 0.16    | 0.05    | 0 (ASPEN) |
|------------------------------------|-----------------|----------------------------------------|---------|---------|---------|-----------|
| Compound                           | (mM)            | Mole concentration outlet reactor (mM) |         |         |         |           |
| acetaldehyde                       |                 | 9.17                                   | 0.01    | 0.01    | 10.89   | 1.59      |
| ethanol                            |                 | 171.27                                 | 269.11  | 443.35  | 515.67  | 512.26    |
| butyraldehyde                      |                 | 30.24                                  | 20.40   | 32.59   | 39.27   | 6.27      |
| ethyl acetate                      |                 | 6.90                                   | 6.96    | 13.47   | 19.84   | 0.10      |
| 1-butanol                          | 9973.90         | 9604.26                                | 9718.54 | 9767.44 | 9777.09 | 9788.50   |
| ethyl butanoate                    |                 | 5.04                                   | 2.54    | 5.44    | 3.37    | 3.10      |
| butyl acetate                      |                 | 305.99                                 | 196.61  | 52.88   | 2.55    | 3.48      |
| 1-hexanol                          |                 | 482.34                                 | 460.94  | 479.58  | 483.80  | 516.31    |
| butyl butanoate                    |                 | 13.14                                  | 23.50   | 40.85   | 40.50   | 45.98     |
| hexyl acetate                      | 524.94          | 19.08                                  | 22.85   | 2.77    | 0.08    | 0.16      |
| butyl hexanoate                    |                 | 1.91                                   | 2.81    | 4.51    | 4.52    | 1.83      |
| hexyl hexanoate                    |                 | 0.00                                   | 0.51    | 0.26    | 0.00    | 0.09      |
| <b>Balance of Alkyl chains (%)</b> |                 |                                        |         |         |         |           |
| Ethyl chain                        | -               | 101.9                                  | 100.8   | 103.1   | 101.3   | -         |
| Butyl chain                        | -               | 100.8                                  | 101.5   | 100     | 95.4    | -         |
| Hexyl chain                        | -               | 97.8                                   | 98.2    | 96.1    | 92.2    | -         |

**Table S4.** Set of linearly independent reactions implemented in a thermodynamic equilibrium reactor in Aspen Plus for the hydrogenolysis of our model mixture.

| item | Reaction                                                           |
|------|--------------------------------------------------------------------|
| 1    | $ethyl\ acetate + H_2 \rightleftharpoons ethanol + acetaldehyde$   |
| 2    | $butyl\ acetate + H_2 \rightleftharpoons butanol + acetaldehyde$   |
| 3    | $hexyl\ acetate + H_2 \rightleftharpoons hexanol + acetaldehyde$   |
| 4    | $ethyl\ butyrate + H_2 \rightleftharpoons ethanol + butyraldehyde$ |
| 5    | $butyl\ butyrate + H_2 \rightleftharpoons butanol + butyraldehyde$ |
| 6    | $hexyl\ butyrate + H_2 \rightleftharpoons hexanol + butyraldehyde$ |
| 7    | $ethyl\ hexanoate + H_2 \rightleftharpoons ethanol + hexanol$      |
| 8    | $butyl\ hexanoate + H_2 \rightleftharpoons butanol + hexanol$      |
| 9    | $hexyl\ hexanoate + H_2 \rightleftharpoons hexanol + hexanol$      |
| 10   | $acetaldehyde + H_2 \rightleftharpoons ethanol$                    |
| 11   | $butyraldehyde + H_2 \rightleftharpoons butanol$                   |
| 12   | $hexanal + H_2 \rightleftharpoons hexanol$                         |

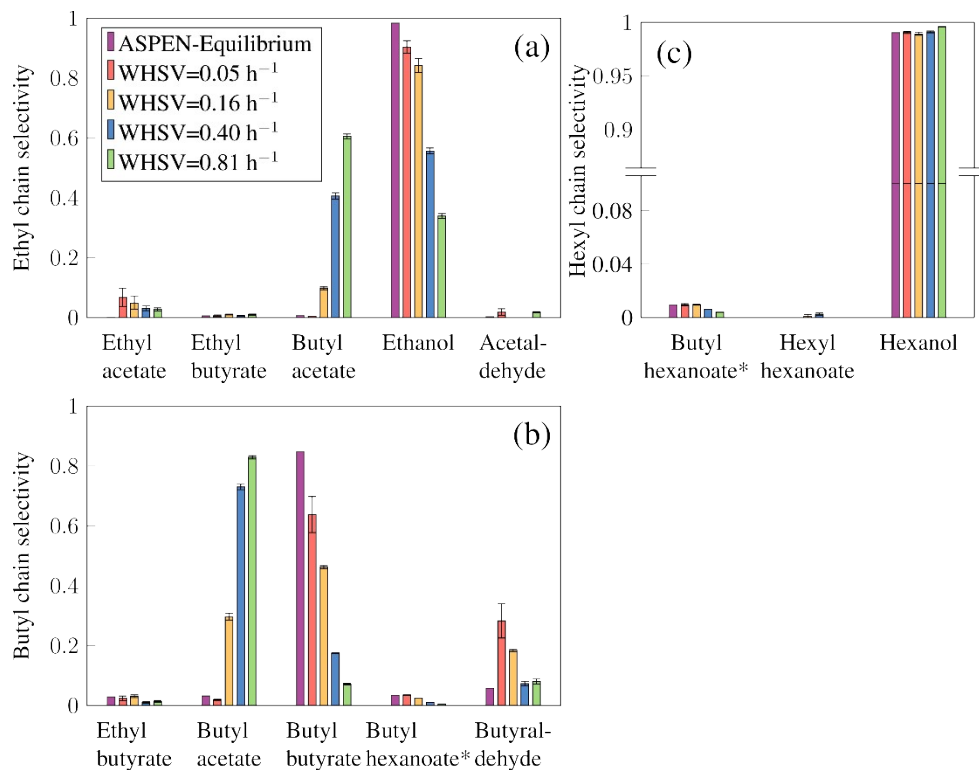

**Figure S4.** Alkyl chains selectivity at various WHSV for a blend of 5% hexyl acetate and 95% butanol,  $T=200^{\circ}\text{C}$ ,  $P_{\text{tot}}=420$  psig, hexyl acetate: $\text{H}_2 = 1:480$ , 100-300 mg 10%wt. Cu/ZrO<sub>2</sub>. The butyl hexanoate marked with \* in figure (b) and (c) represents the sum of butyl hexanoate and hexyl butanoate given that both esters had similar retention times in our analytics and peak deconvolution was not possible to differentiate both species

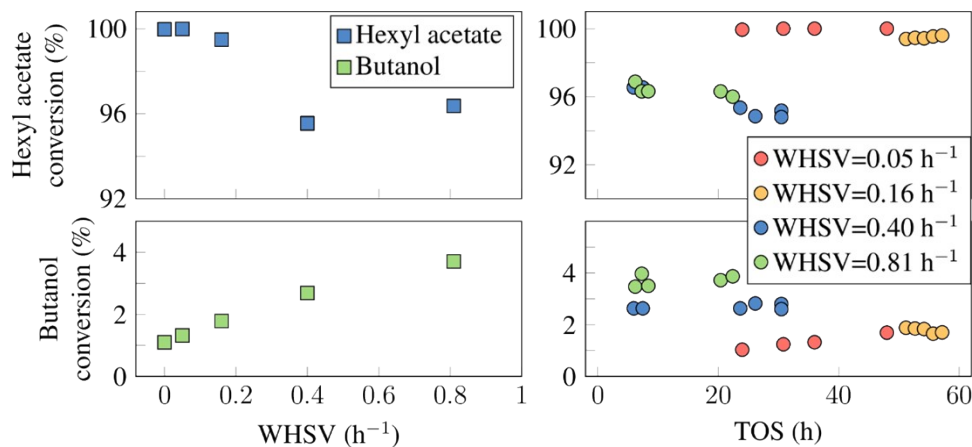

**Figure S5.** Hexyl acetate and Butanol conversion as a function of WHSV (left) and TOS (h) (right).



**Table S5.** Linearly independent reactions for the hydrogenolysis equilibrium reactor using a simulated Guerbet stream. *Item* starts from 13 because these reactions are a complement for Table S1.

| item | Reaction                                                          |
|------|-------------------------------------------------------------------|
| 13   | 2-Pentanone + $H_2 \rightleftharpoons$ 2-Pentanol                 |
| 14   | 2-Heptanone + $H_2 \rightleftharpoons$ 2-Heptanol                 |
| 15   | 2-Ethyl-butanal + $H_2 \rightleftharpoons$ 2-Ethyl-butanol        |
| 16   | 2-Ethyl-hexanal + $H_2 \rightleftharpoons$ 2-Ethyl-hexanol        |
| 17   | Octanal + $H_2 \rightleftharpoons$ Octanol                        |
| 18   | Ethyl octanoate + $H_2 \rightleftharpoons$ Ethanol + Octanal      |
| 19   | Butyl octanoate + $H_2 \rightleftharpoons$ Butanol + Octanal      |
| 20   | Hexyl octanoate + $H_2 \rightleftharpoons$ Hexanol + Octanal      |
| 21   | Octyl octanoate + $H_2 \rightleftharpoons$ Octanol + Octanal      |
| 22   | Octyl Acetate + $H_2 \rightleftharpoons$ Octanol + Acetaldehyde   |
| 23   | Octyl butyrate + $H_2 \rightleftharpoons$ Octanol + Butyraldehyde |
| 24   | Octyl hexanoate + $H_2 \rightleftharpoons$ Octanol + hexanal      |

**Table S6.** Molar concentration distribution of all the species identified in our experiment for the Guerbet coupling stream Renormalized G-66 presented in table S2 run at WHSV=0.07 h<sup>-1</sup>. Molar concentrations in the liquid phase for the feed, the experimental results after reaction and equilibrium concentrations predicted by Aspen are presented in mmol/L.

| Compound        | Mole concentration (mM) |                                         |                     |
|-----------------|-------------------------|-----------------------------------------|---------------------|
|                 | Feed                    | Experiment (WHSV=0.07 h <sup>-1</sup> ) | Equilibrium (ASPEN) |
| Ethanol         | 0.00                    | 239.16                                  | 198.07              |
| Butanol         | 5824.53                 | 6376.23                                 | 6271.45             |
| Hexanol         | 1243.16                 | 1625.34                                 | 1658.94             |
| Octanol         | 302.81                  | 386.49                                  | 420.13              |
| 2-ethyl-butanol | 455.13                  | 439.07                                  | 445.11              |
| 2-ethyl-hexanol | 298.25                  | 282.55                                  | 292.33              |
| 2-pentanol      | 189.71                  | 170.42                                  | 181.31              |
| 2-heptanol      | 108.54                  | 91.10                                   | 34.65               |
| Acetaldehyde    | 0.00                    | 7.41                                    | 0.62                |
| Butyraldehyde   | 0.00                    | 17.19                                   | 4.02                |
| Hexanal         | 0.00                    | 0.37                                    | 1.56                |
| Octanal         | 0.00                    | 0.00                                    | 0.13                |
| 2-ethyl-butanal | 0.00                    | 0.00                                    | 1.56                |
| 2-Ethyl-hexanal | 0.00                    | 0.00                                    | 0.37                |
| 2-pentanone     | 0.00                    | 9.83                                    | 4.87                |
| 2-heptanone     | 0.00                    | 5.09                                    | 71.87               |
| Butyl butyrate  | 200.66                  | 13.97                                   | 14.64               |
| Butyl acetate   | 0.00                    | 0.00                                    | 0.66                |
| Ethyl acetate   | 0.00                    | 0.00                                    | 0.01                |
| Ethyl butyrate  | 0.00                    | 1.79                                    | 0.59                |
| Hexyl acetate   | 78.44                   | 0.00                                    | 0.15                |
| Ethyl hexanoate | 111.27                  | 0.00                                    | 0.09                |
| Hexyl butyrate  | 20.07                   | 7.58                                    | 2.95                |
| Butyl hexanoate | 166.91                  | 0.00                                    | 2.95                |
| Hexyl hexanoate | 10.94                   | 0.00                                    | 0.76                |
| Ethyl octanoate | 0.00                    | 0.00                                    | 0.25                |
| Butyl octanoate | 6.38                    | 2.75                                    | 0.73                |
| Hexyl octanoate | 58.37                   | 0.89                                    | 0.19                |
| Octyl octanoate | 17.33                   | 0.54                                    | 0.05                |
| Octyl acetate   | 14.59                   | 0.00                                    | 0.05                |
| Octyl butyrate  | 13.68                   | 0.00                                    | 0.73                |
| Octyl hexanoate | 0.00                    | 0.00                                    | 0.19                |

### S3. Supplemental information for etherification experiments

**Table S7.** Set of reactions used in the etherification reactor model. Conversion for each reaction was determined based on the experimental results obtained. Chemical species labeling: letter indicates species type, and number carbon length. A: alcohol, O: olefins, E: Ethers, and W: water. If more than one ether of length "X" is produced it is indicated with a second number (e.g., E12-1, and E12-2). Secondary alcohols are shown by adding the particle 2N to the name (e.g., A9-2N).

| Item | Reaction                | Conversion |
|------|-------------------------|------------|
| 1    | 2A4->E8+W               | 0.159      |
| 2    | A4 + A6-2 --> E10 + W   | 0.115      |
| 3    | A4 + A6 --> E10-1+ W    | 0.258      |
| 4    | A4 + A8-2 --> E12 + W   | 0.153      |
| 5    | A4 + A8 --> E12-3 + W   | 0.195      |
| 6    | A4--> O4 + W            | 0.013      |
| 7    | A4-2N --> O4 + W        | 1          |
| 8    | A5-2 -->O5 + W          | 0.491      |
| 9    | A6 + A6-2 --> E12-1 + W | 0.03       |
| 10   | 2 A6 --> E12-2+ W       | 0.372      |
| 11   | A6 + A8 --> E14 + W     | 0.373      |
| 12   | A6 + A8-2 --> E14-1+ W  | 0.272      |
| 13   | 2 A6 --> E12-2 + W      | 0.028      |
| 14   | A6-2 + A8 --> E14-2 + W | 0.035      |
| 15   | A6-2 --> O6+ W          | 0.385      |
| 16   | A7-2N --> O7 + W        | 1          |
| 17   | A8-2 --> O8 + W         | 0.432      |
| 18   | 2 A8 --> E16-3 + W      | 0.04       |
| 19   | A8 --> O8 + W           | 0.107      |
| 20   | A8-2N --> O8 + W        | 0.432      |
| 21   | A8-2N --> O8 + W        | 0.432      |
| 22   | A9-2N --> O9 + W        | 1          |

#### S4. Supplemental information for the technoeconomic analysis

**Table S8.** Parameters and assumptions in the discounted cash flow analysis

|                                   | Parameter value       | Source |
|-----------------------------------|-----------------------|--------|
| <b>General parameters</b>         |                       |        |
| Reference capacity                | 504 Ton/day           | 2      |
| Reference year                    | 2021                  |        |
| <b>Financial variables</b>        |                       |        |
| Equity                            | 40%                   | 2      |
| Loan interest                     | 8%                    |        |
| Loan term (years)                 | 10                    |        |
| Operation period (years)          | 30                    |        |
| Depreciation period (years)       | 7                     |        |
| Construction period (years)       | 3                     |        |
| Discount rate                     | 10%                   |        |
| Income tax                        | 21%                   |        |
| Working capital (% of FCI)        | 5%                    |        |
| <b>Direct costs</b>               |                       |        |
| OSBL (% of ISBL)                  | 40%                   | 2      |
| Warehouse (% of ISBL)             | 4%                    |        |
| Site development (% of ISBL)      | 9%                    |        |
| Additional piping (% of ISBL)     | 4.5%                  |        |
| <b>Indirect costs</b>             |                       |        |
| Proratable expenses (% TDC)       | 10%                   | 2      |
| Field development (% TDC)         | 10%                   |        |
| Office & construction fee (% TDC) | 20%                   |        |
| Contingency (% TDC)               | 40%                   |        |
| Other cost (%TDC)                 | 10%                   |        |
| <b>Materials</b>                  |                       |        |
| Ethanol (\$/kg)                   | 0.999                 | 2      |
| H <sub>2</sub> (\$/kg)            | 1.43                  | 3      |
| Catalyst Guerbet (\$/Kg)          | 27.76                 | 4      |
| Catalyst Hydrogenolysis (\$/Kg)   | 28.72                 | 4      |
| Catalyst Etherification (\$/Kg)   | 18.5                  | 5      |
| Catalyst Oligomerization (\$/Kg)  | 6                     | 6      |
| <b>Utilities</b>                  |                       |        |
| Refrigerant (\$/kJ)               | $2.24 \times 10^{-7}$ | 1      |
| Water (\$/kJ)                     | $2.24 \times 10^{-7}$ |        |
| Low pressure steam (\$/kJ)        | $2.00 \times 10^{-6}$ |        |
| Medium pressure steam (\$/kJ)     | $2.32 \times 10^{-6}$ |        |
| Hot oil (\$/kJ)                   | $3.69 \times 10^{-6}$ |        |
| Fired heat (\$/kJ)                | $4.48 \times 10^{-6}$ |        |
| Electricity (\$/kJ)               | $1.68 \times 10^{-5}$ |        |
| <b>Waste management</b>           |                       |        |
| Waste treatment(\$/kg-organic)    | 0.35                  | 7      |
| <b>Labor</b>                      |                       |        |
| Shifts                            | 5                     | 2      |
| Manager                           | 1 (\$193.000)         |        |
| Engineers                         | 3(\$92.000)           |        |
| Maintenance supervision           | 3 (\$75.000)          |        |
| Maintenance technicians           | 15 (\$53.000)         |        |
| Shift supervisors                 | 5 (\$63.000)          |        |
| Shift operators                   | 25(\$52.000)          |        |

**Table S9.** Details of the process equipment cost and design parameters for the different areas. P: pressure of operation. T: temperature of operation.  $\Delta P$ : pressure drop. N: number of plates.

|                         | Equipment                    | Cost   | P [Bar] | T [°C] | Duty | $\Delta P$ [Bar] | N   | Reflux | Feed stage |
|-------------------------|------------------------------|--------|---------|--------|------|------------------|-----|--------|------------|
| Guerbet coupling area   | Guerbet reactor              | \$1.41 | 25      | 325    |      |                  |     |        |            |
|                         | Hydrogenolysis reactor       | \$3.85 | 25      |        | 0    |                  |     |        |            |
|                         | Compressor 1                 | \$5.15 |         |        |      | 1                |     |        |            |
|                         | Compressor 2                 | \$1.41 |         |        |      | 3                |     |        |            |
|                         | Compressor 3                 | \$1.52 |         |        |      | 5                |     |        |            |
|                         | Pump 1                       | \$0.44 |         |        |      | 25               |     |        |            |
|                         | Pump 2                       | \$0.54 |         |        |      | 25               |     |        |            |
|                         | Pump 3                       | \$0.53 |         |        |      | 25               |     |        |            |
|                         | Pump 4                       | \$0.39 |         |        |      | 22               |     |        |            |
|                         | Pump 5                       | \$0.05 |         |        |      | 7                |     |        |            |
|                         | Pump 6                       | \$0.35 |         |        |      | 17               |     |        |            |
|                         | Flash vessel 1               | \$0.56 | 24      | 25     |      |                  |     |        |            |
|                         | Flash vessel 2               | \$0.18 | 1       | 35     |      |                  |     |        |            |
|                         | Flash vessel 3               | \$0.08 | 3       | 35     |      |                  |     |        |            |
|                         | Flash vessel 4               | \$0.08 | 8       | 35     |      |                  |     |        |            |
|                         | Column 1-Guerbet             | \$4.63 | 1       |        |      |                  | 20  | 1      | 10         |
|                         | Column 2-Guerbet             | \$3.57 | 1       |        |      |                  | 30  | 1      | 10         |
| Column 3-Guerbet        | \$4.25                       | 1      |         |        |      | 60               | 1   | 10     |            |
| Column 4-Guerbet        | \$9.11                       | 1      |         |        |      | 60               | 1.7 | 10     |            |
| Column 5-Guerbet        | \$1.71                       | 1      |         |        |      | 31               | 1   | 10     |            |
| Etherification area     | Etherification reactor       | \$0.24 | 7       |        | 0    |                  |     |        |            |
|                         | Pump 1                       | \$0.13 | 6       |        |      |                  |     |        |            |
|                         | Pump 2                       | \$0.04 | 6       |        |      |                  |     |        |            |
|                         | Flash vessel                 | \$0.12 | 1       | 78     |      |                  |     |        |            |
|                         | Column 1-Etherification      | \$3.39 | 5       |        |      |                  | 35  | 2      | 10         |
|                         | Column 2-Etherification      | \$1.08 | 1       |        |      |                  | 20  | 2      | 10         |
|                         | Column 3-Etherification      | \$4.79 | 1       |        |      |                  | 60  | 6      | 15         |
|                         | Column 4-Etherification      | \$7.93 | 3       |        |      |                  | 40  | 4      | 9          |
|                         | Column 5-Etherification      | \$0.61 | 1       |        |      |                  | 20  | 2      | 10         |
| Column 6-Etherification | \$1.84                       | 1      |         |        |      | 20               | 2   | 10     |            |
| Column 7-Etherification | \$1.10                       | 1      |         |        |      | 20               | 2   | 10     |            |
| Olig.                   | Oligomerization reactor      | \$0.41 | 40      | 230    |      |                  |     |        |            |
|                         | Pump 1                       | \$0.50 |         |        |      | 40               |     |        |            |
|                         | Pump 2                       | \$0.49 |         |        |      | 38               |     |        |            |
|                         | Column 1-Oligomerization     | \$0.82 | 2       |        |      |                  | 25  | 2      | 10         |
| Sep.                    | Column 1-Final fractionation | \$0.62 | 1       |        |      |                  | 20  | 2      | 10         |
|                         | Column 3-Final fractionation | \$0.52 | 1       |        |      |                  | 20  | 1.5    | 10         |
|                         | Column 3-Final fractionation | \$2.04 | 1       |        |      |                  | 40  | 3      | 10         |

**Table S10.** Results for Guerbet coupling with 30% conversion using a cofeed strategy. The table shows the carbon stoichiometry of the reaction, i.e., it shows that at 30% conversion 73.73 mols of ethanol and 26.27 mols of butanol, yield a blend consisting of parafins (P), olefins (O), alcohols (A), aldehydes (AL), ketones (K), esters (ES) and some other minor components.

| Component                           | Symbol | Carbon stoichiometry |
|-------------------------------------|--------|----------------------|
| Ethanol                             | A2     | -73.73               |
| Butanol                             | A4     | -26.27               |
| ethane                              | P2     | 0.03                 |
| n-propane                           | P3     | 0.09                 |
| n-butane                            | P4     | 0.01                 |
| n-pentane                           | P5     | 0.15                 |
| n-hexane                            | P6     | 0.00                 |
| ethylene                            | O2     | 0.03                 |
| propene                             | O3     | 0.25                 |
| 1-butene                            | O4     | 0.14                 |
| 1-pentene                           | O5     | 0.15                 |
| 2-propanol                          | A3     | 0.52                 |
| 2-butanol                           | A4-2   | 0.11                 |
| 2-methyl-1-butanol                  | A5-2N  | 0.09                 |
| 2-ethylbutan-1-ol                   | A6-2   | 4.50                 |
| 1-hexanol                           | A6     | 16.13                |
| 2-heptanol                          | A7-2N  | 0.13                 |
| 2-ethylhexan-1-ol                   | A8-2   | 1.91                 |
| 1-octanol                           | A8     | 2.52                 |
| 2-ethyloctan-1-ol                   | A10-2  | 0.21                 |
| 1-decanol                           | A10    | 0.31                 |
| 2-hexyl-1-octanol                   | A12-2  | 0.50                 |
| acetaldehyde                        | AL2    | 13.72                |
| butyraldehyde                       | AL4    | 25.50                |
| 2-ethyl-2-butenal                   | AL6-2  | 0.09                 |
| hexanal                             | AL6    | 3.29                 |
| 2-ethylhexanal                      | AL8-2  | 0.73                 |
| octanal                             | AL8    | 0.63                 |
| decanal                             | AL10   | 0.22                 |
| 2-butanone                          | K4     | 0.39                 |
| 2-pentanone                         | K5     | 1.57                 |
| 2-heptanone                         | K7     | 2.06                 |
| 3-octanone                          | K8     | 0.08                 |
| 2-nonanone                          | K9     | 1.07                 |
| 4-undecanone                        | K11    | 0.55                 |
| ethyl acetate                       | ES4    | 4.08                 |
| ethyl butanoate                     | ES6    | 4.17                 |
| butyl acetate                       | ES6-2  | 3.38                 |
| butyl butanoate                     | ES8    | 3.26                 |
| ethyl hexanoate                     | ES8-2  | 1.18                 |
| acetic acid, hexyl ester            | ES8-3  | 0.42                 |
| butyl hexanoate                     | ES10   | 1.66                 |
| butanoic acid, 2-ethyl, butyl ester | ES10-2 | 0.14                 |
| hexyl hexanoate                     | ES12   | 0.62                 |
| butyl decanoate                     | ES14   | 0.14                 |
| diethyl ether                       | E4     | 0.01                 |
| 1-propoxy-1-ethanol                 | B5     | 0.64                 |
| 1,1-diethoxybutane                  | B8     | 0.28                 |
| 1-butoxy-1-ethoxyethane             | B8-2   | 0.67                 |
| 1,1-dibutoxyethane                  | B10    | 0.48                 |
| COx                                 | CO2    | 1.20                 |

## S5. Supplemental information for lifecycle analysis

The inventory for the upgrading process is shown in table S11 and the composition of the energy mix in this study in table S12. The upgrading process is modelled in detail. Other processes such as biomass cultivation, and ethanol production are modeled based on processes on GREET. Figure S6 shows the boundaries of the system as well as the foreground and background processes.

**Table S11.** Inventory for the upgrading process

|             |                    |                             |             |       |
|-------------|--------------------|-----------------------------|-------------|-------|
| Inputs      | Feedstock          | Ethanol                     | 21034.7     | Kg/h  |
|             |                    | Hydrogen                    | 1164.0      | Kg/h  |
|             | Catalysts          | 0.1%Cu/Mg <sub>3</sub> AlO  | 0.4         | Kg/h  |
|             |                    | Cu/ZrO <sub>2</sub>         | 73.0        | kg/h  |
|             |                    | Zeolite                     | 6.2         | kg/h  |
|             | Energy             | Natural gas                 | 241594646.0 | kJ/h  |
| Electricity |                    | 9798416.6                   | kJ/h        |       |
| Outputs     | Products           | Diesel                      | 486647074.2 | kJ/h  |
|             |                    | Gasoline                    | 23203594.5  | kJ/h  |
|             | Emissions to water | Organic components to water | 344.1       | kg/hr |
|             |                    | Water                       | 6081.6      | kg/hr |
|             | Emissions to air   | CO <sub>2</sub>             | 4160.1      | kg/hr |
|             |                    | Water                       | 12971.0     | kg/hr |

**Table S12.** US energy mix used in this study.

| Source                                             | Percentage |
|----------------------------------------------------|------------|
| Oil fired power generation                         | 0.2736     |
| Coal fired power generation                        | 23.8358    |
| Natural gas fired power generation                 | 36.47.33   |
| Nuclear power generation                           | 19.5598    |
| Biomass power generation                           | 0.32       |
| Hydroelectric power generation                     | 6.5338     |
| Geothermal electricity production                  | 0.3989     |
| Wind power generation                              | 9.4761     |
| Solar power plant                                  | 2.6834     |
| Electricity from biogenic waste, and other sources | 0.4413     |

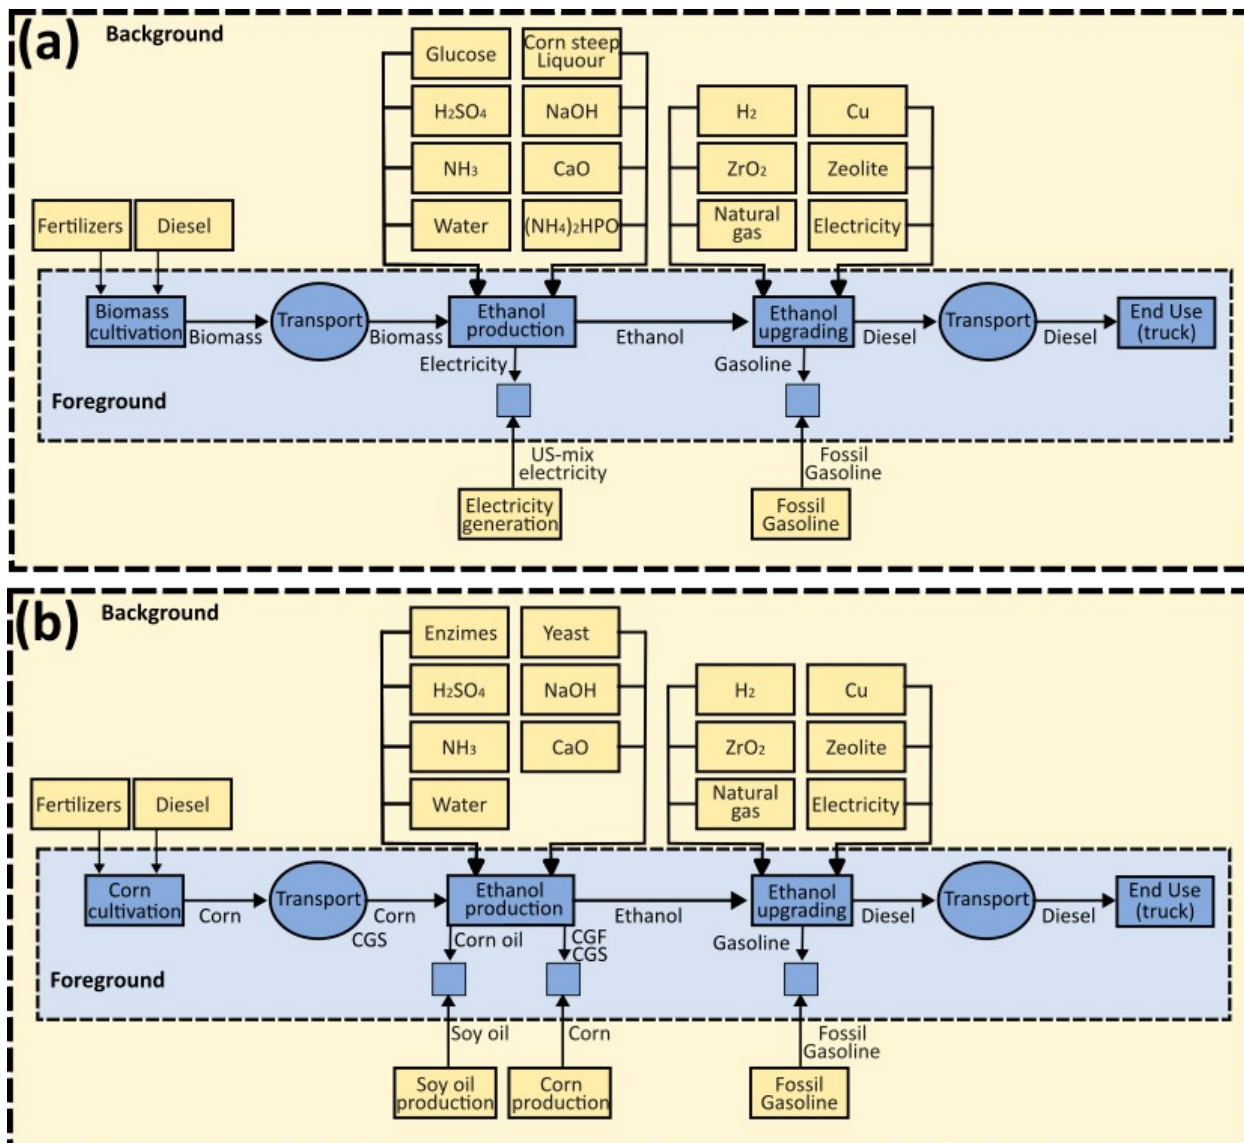

**Figure S6.** System boundaries (a) systems that use ethanol produced from lignocellulosic biomass (b) systems that use ethanol produced from corn as feedstock.

While the process that we have developed has been optimized to reduce cost and environmental impacts, there are still possible technological developments. Future improvements may lead to even lower environmental impacts. To explore the impact of these potential improvements on GHG emissions, we perform a parametric analysis in Figure S7. In this figure, we focus on two feedstocks, corn ethanol (coupled with carbon capture) and corn stover. We select these feedstocks considering their abundance in the U.S.<sup>8</sup> In the parametric analysis, we systematically vary the biorefinery energy needs (which can be reduced for example by operating at higher conversions), and the hydrogen consumption in the system (which can be reduced for example by improving the gas separation operations). Two limiting cases are explored, a pessimistic case in which all settings correspond to scenario 1 on Figure 11, and an optimistic case in which settings correspond to scenario 8. In the figure the relative energy and hydrogen consumption with respect to the base case design are systematically

changed in the x-axis and y-axis respectively. Interestingly, in the optimistic case, the carbon footprint is reduced with increased energy consumption. This is explained by considering that the natural gas used in this case has negative emissions.

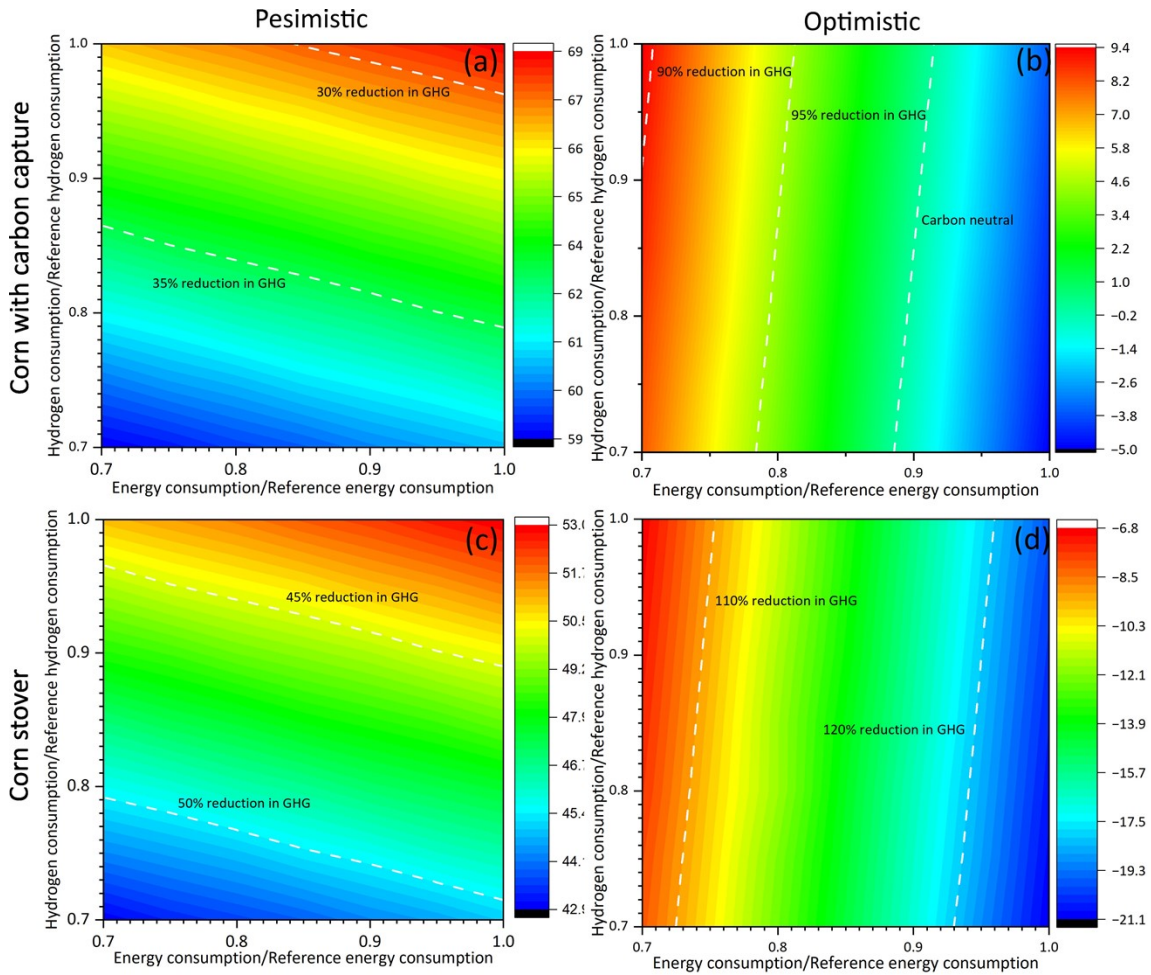

**Figure S7.** Sensitivity analysis showing the GHG emissions as a function of energy (x-axis) and hydrogen consumed (y-axis). Both axes are normalized with respect to the reference design. (a) Corn with carbon capture pessimistic scenario (b) Corn with carbon capture optimistic scenario (c) Corn stover pessimistic scenario (d) Corn stover optimistic scenario.



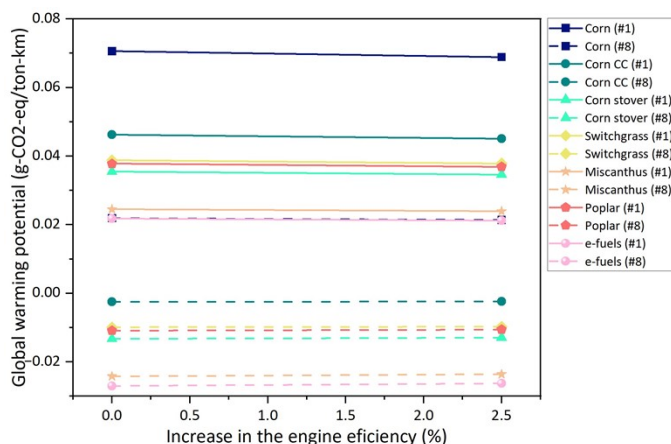

**Figure S8.** GHG emissions throughout the life cycle as a function of engine energy efficiency.

## S6. Engine performance

**Table S13.** Engine geometry

| Parameter         | Units           | Value            |
|-------------------|-----------------|------------------|
| Bore              | mm              | 82               |
| Stroke            | mm              | 90.4             |
| Displacement      | cm <sup>3</sup> | 475              |
| Compression Ratio | -               | 17:1             |
| Swirl Ratio       | -               | Variable 2.3-5.6 |
| IVC/IVO           | CAD             | -132° / 350      |
| EVO/EVC           | CAD             | 112° / -332      |

## References

- 1 J.-M. Restrepo-Florez, P. A. Cuello-penalosa, E. Canales, Dustin Witkowski, D. A. Rothamer, G. W. Huber and C. T. Maravelias, *Sustain Energy Fuels*, , DOI:10.1039/d2se01377k.
- 2 D. Humbird, R. Davis, L. Tao, C. Kinchin, D. Hsu, A. Aden, P. Schoen, J. Lukas, B. Olthof, M. Worley, D. Sexton and D. Dudgeon, *Process Design and Economics for Biochemical Conversion of Lignocellulosic Biomass to Ethanol: Dilute-Acid Pretreatment and Enzymatic Hydrolysis of Corn Stover*, Golden, Colorado, 2011.
- 3 L. Tao, J. N. Markham, Z. Haq and M. J. Bidy, *Green Chemistry*, 2017, **19**, 1082–1101.
- 4 F. G. Baddour, L. Snowden-Swan, J. D. Super and K. M. Van Allsburg, *Org Process Res Dev*, 2018, **22**, 1599–1605.
- 5 HY zeolite cost, [https://www.alibaba.com/product-detail/high-purity-hy-zeolite-catalyst-micro\\_1600062317816.html?spm=a2700.galleryofferlist.normal\\_offer.d\\_title.2f391e6b3Ao4kp](https://www.alibaba.com/product-detail/high-purity-hy-zeolite-catalyst-micro_1600062317816.html?spm=a2700.galleryofferlist.normal_offer.d_title.2f391e6b3Ao4kp), (accessed May 1, 2023).
- 6 HZSM5 Zeolite cost, [https://www.alibaba.com/product-detail/Zeolite-Zsm5-Zsm-5-Price-Zeolite\\_62579342984.html?spm=a2700.galleryofferlist.topad\\_creative.d\\_title.2d7761c2HmAN7FHighlight](https://www.alibaba.com/product-detail/Zeolite-Zsm5-Zsm-5-Price-Zeolite_62579342984.html?spm=a2700.galleryofferlist.topad_creative.d_title.2d7761c2HmAN7FHighlight), (accessed May 1, 2023).

- 7 W. D. Seider, D. R. Levin, J. D. Seader, S. Widagdo, R. Gani and K. M. Ng, *Product and process design and principles*, 2017, vol. 4.
- 8 M. Langholtz, B. Stokes and L. Eaton, *2016 billion-ton report: Advancing domestic resources for a thriving bioeconomy*, Oak Ridge, Tennessee, 2016.
